# Supplementary material for: Dual-carbon coupling modulated bimetallic sulfides as high-efficiency bifunctional oxygen electrocatalysts in a rechargeable Zn–air battery
Source: Royal Society of Chemistry journal article supplement (doi:10.1039/d4se00793j), 2024-01-01
Supplement: d4se00793j1.pdf [file d4se00793j1.pdf]

## Dual-carbon coupling modulated bimetallic sulfides as high-efficiency bifunctional oxygen electrocatalysts in rechargeable Zn-air battery

Yongxia Wang<sup>\*a,b</sup>, Jingjing Liu<sup>a</sup>, Jiayi Liu<sup>a</sup>, Zhaodi Wang<sup>a</sup>, Biyan Zhuang<sup>a</sup>, Nengneng Xu<sup>a</sup>, Xiangzhi Cui<sup>\*b,d</sup>, Jinli Qiao<sup>\*a, b</sup>

According to the disk current ( $I_d$ ) and ring current ( $I_r$ ) obtained from the RRDE measurements,  $H_2O_2\%$  (the  $H_2O_2$  yield rate) and  $n$  (electron transfer number) can be calculated with the following equation:

$$H_2O_2\% = 100 \times \frac{2I_r / N}{I_d + I_r / N} \quad (1)$$

$$n = \frac{4I_d}{I_d + I_r / N} \quad (2)$$

Where  $N = 0.37$  means the current collection efficiency of Pt ring, calibrated in 0.1M KOH with 10mM  $K_3Fe(CN)_6$  electrolyte.

The kinetic parameters can be analyzed on the basis of the Koutecky-Levich equations:

$$\frac{1}{J} = \frac{1}{J_L} + \frac{1}{J_K} = \frac{1}{B\omega^{\frac{1}{2}}} + \frac{1}{J_K} \quad (1)$$

$$B = 0.62nFC_0D_0^{\frac{2}{3}}V^{-\frac{1}{6}} \quad (2)$$

$$J_K = nFkC_0 \quad (3)$$

In which  $J$  is the measured current density,  $J_K$  and  $J_L$  are the kinetic and diffusion-limiting current densities,  $\omega$  is the rotation rate in  $\text{rad s}^{-1}$ ,  $n$  is the overall number of electrons transferred in oxygen reduction,  $F$  is the Faraday constant ( $F = 96485 \text{ C mol}^{-1}$ ),  $C_0$  is the bulk concentration of  $\text{O}_2$  ( $C_0 = 1.3 \times 10^{-6} \text{ mol cm}^{-3}$ ),  $D_0$  is diffusion coefficient of  $\text{O}_2$  in the bulk solution ( $D_0 = 1.7 \times 10^{-5} \text{ cm}^2 \text{ s}^{-1}$ ),  $\nu$  is the kinematic viscosity of the solution ( $0.01 \text{ cm}^2 \text{ s}^{-1}$ ),  $k$  is the electron-transfer rate constant. The number of electron transfer ( $n$ ) can be obtained from the slope of the Koutecky-Levich plots ( $J^{-1}$  vs  $\omega^{-1/2}$ ).

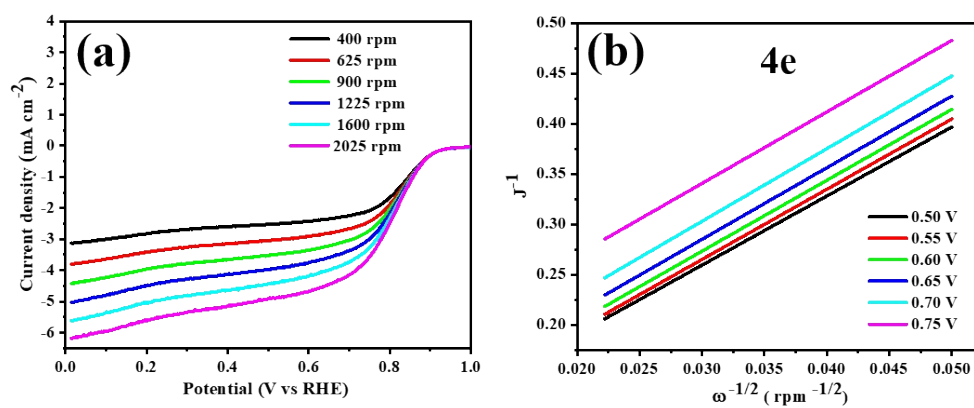

**Fig. S1** (a) The LSV curves for ORR of  $\text{Co}_{0.2}\text{Fe}_{0.6}\text{S}_x\text{-Gra/CNT}$  at different rotating rates from 400 rpm to 2025 rpm; (b) Koutecky–Levich plots for oxygen reduction of  $\text{Co}_{0.2}\text{Fe}_{0.6}\text{S}_x\text{-Gra/CNT}$  at varied potentials.

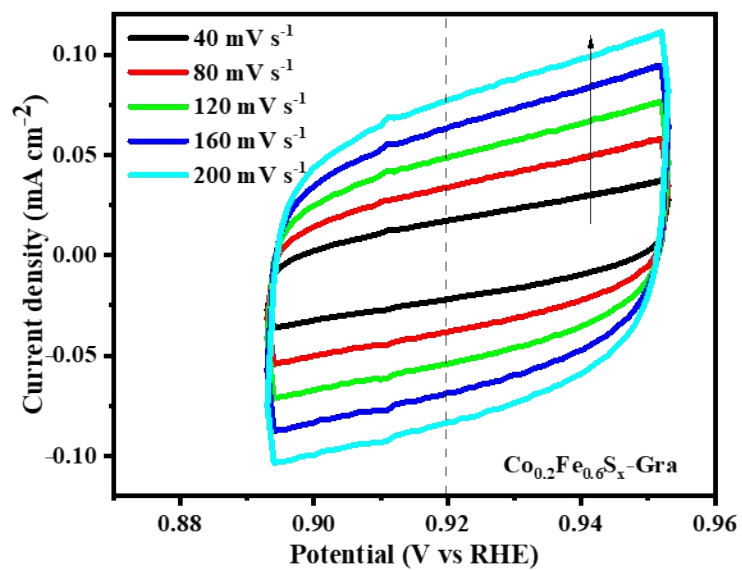

**Fig. S2** The CV curves of  $\text{Co}_{0.2}\text{Fe}_{0.6}\text{S}_x\text{-Gra}$  for ORR scanning at different scanning rate range from 40 to 200  $\text{mV s}^{-1}$ .

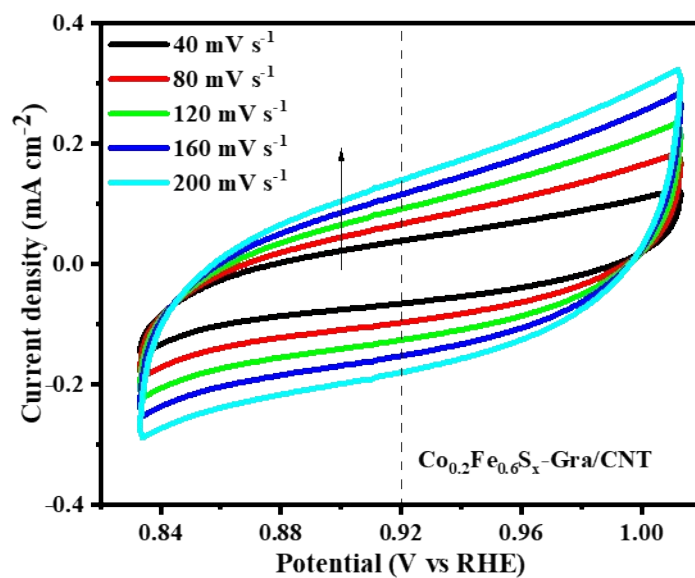

**Fig. S3** The CV curves of  $\text{Co}_{0.2}\text{Fe}_{0.6}\text{S}_x\text{-Gra/CNT}$  for ORR scanning at different scanning rate range from 40 to 200  $\text{mV s}^{-1}$ .

**Table S1** Comparison of reported metallic sulfide based catalysts for ORR and OER

| Catalyst                                                               | Electrolyte | ORR           | OER            | Ref. |
|------------------------------------------------------------------------|-------------|---------------|----------------|------|
|                                                                        |             | $E_{1/2}$ (V) | $E_{j=10}$ (V) |      |
| Ni <sub>1</sub> Co <sub>4</sub> S@C-1000                               | 0.1M KOH    | 0.6           | 1.51           | [1]  |
| Co <sub>9</sub> S <sub>8</sub> /C NSs                                  | 0.1M KOH    | 0.778         | 1.667          | [2]  |
| NiFeVS                                                                 | 0.1M KOH    | 0.789         | 1.557          | [3]  |
| Co <sub>0.5</sub> Fe <sub>0.5</sub> S@N-MC                             | 0.1M KOH    | 0.808         | 1.64           | [4]  |
| CoNiFe-S MNs                                                           | 0.1M KOH    | 0.78          | 1.49           | [5]  |
| N-Co <sub>0.8</sub> Fe <sub>0.1</sub> Ni <sub>0.1</sub> S <sub>x</sub> | 0.1M KOH    | 0.80          | 1.60           | [6]  |
| Co-NC@CoFeS <sub>2</sub>                                               | 0.1M KOH    | 0.805         | 1.451          | [7]  |
| (Ni,Co)S <sub>2</sub>                                                  | 0.1M KOH    | 0.71          | 1.50           | [8]  |

## Reference

- [1] B. Chen, G. Ma, Y. Zhu, J. Wang, W. Xiong, Y. Xia, Metal-organic-framework-derived bi-metallic sulfide on N, S-codoped porous carbon nanocomposites as multifunctional electrocatalysts, *Journal of Power Sources*, 334 (2016) 112-119.
- [2] L. Li, L. Song, H. Guo, W. Xia, C. Jiang, B. Gao, C. Wu, T. Wang, J. He, N-Doped porous carbon nanosheets decorated with graphitized carbon layer encapsulated Co<sub>9</sub>S<sub>8</sub> nanoparticles: an efficient bifunctional electrocatalyst for the OER and ORR, *Nanoscale*, 11 (2019) 901-907.
- [3] F.N.I. Sari, Y.C. Lai, Y.J. Huang, X.Y. Wei, H. Pourzolfaghar, Y.H. Chang, M. Ghufron, Y.Y. Li, Y.H. Su, O. Clemens, J.M. Ting, Electronic Structure Engineering in NiFe Sulfide via A Third Metal Doping as Efficient Bifunctional OER/ORR Electrocatalyst for Rechargeable Zinc-Air Battery, *Advanced Functional Materials*, 34 (2024).
- [4] M. Shen, C. Ruan, Y. Chen, C. Jiang, K. Ai, L. Lu, Covalent Entrapment of Cobalt–Iron Sulfides in N-Doped Mesoporous Carbon: Extraordinary Bifunctional Electrocatalysts for Oxygen Reduction and Evolution Reactions, *ACS Applied Materials & Interfaces*, 7 (2015) 1207-1218.
- [5] H. Yang, B. Wang, H. Li, B. Ni, K. Wang, Q. Zhang, X. Wang, Trimetallic Sulfide Mesoporous Nanospheres as Superior Electrocatalysts for Rechargeable Zn–Air Batteries, *Advanced Energy Materials*, 8 (2018).
- [6] J. Li, T. Wan, J. Li, Z. Zhang, Y. Wang, G. Liu, Three-dimensionally ordered mesoporous trimetal sulfide as efficient electrocatalyst for rechargeable zinc-air batteries, *Applied Surface Science*, 575 (2022).
- [7] Y. Wang, W. Jin, C. Xuan, J. Wang, J. Li, Q. Yu, B. Li, C. Wang, W. Cai, J. Wang, In-situ growth of CoFeS<sub>2</sub> on metal-organic frameworks-derived Co-NC polyhedron enables high-performance oxygen electrocatalysis for rechargeable zinc-air batteries, *Journal of Power Sources*, 512 (2021).
- [8] J. Zhang, X. Bai, T. Wang, W. Xiao, P. Xi, J. Wang, D. Gao, J. Wang, Bimetallic Nickel Cobalt Sulfide as Efficient Electrocatalyst for Zn–Air Battery and Water Splitting, *Nano-Micro Letters*, 11 (2019).
